# Supplementary material
Source: Research Square preprint supplement (doi:10.21203/rs.3.rs-9599933/v1)
Supplement: Supplementary file 1 [file 3b156ce1dc759400f03034f8.docx]

**Graph1. Effect of exposure time to PVS2 solution on encapsulated shoot tips viability (stored at 4℃)**

Length of exposure time to PVS2 vitrification solution (min)

**Graph.2. Effect of exposure time to PVS2 solution on encapsulated shoot tips viability (stored at 25℃)**

**Graph3. Effect of exposure time to PVS2 solution on encapsulated nodal segments of *Tinospora cordifolia* viability (stored at 4℃)**

**Graph.4. Effect of exposure time to PVS2 solution on encapsulated nodal segments viability (stored at 25℃)**
